# Supplementary material
Source: PubMed Central journal article supplement (PMC10936112)
Supplement: jama-e240851-s001.pdf [file jama-e240851-s001.pdf]

## Supplemental Online Content

Li L, Zhu N, Zhang L, et al. ADHD pharmacotherapy and mortality in individuals with ADHD. *JAMA*. doi:10.1001/jama.2024.0851

### eMethods

**eTable 1.** Anatomical Therapeutic Chemical (ATC) codes for ADHD medication from the Prescribed Drug Register

**eTable 2.** The number and proportion of causes of death during a 5-year follow-up period

**eTable 3.** International Classification of Diseases Tenth Revisions (ICD-10) codes from the Swedish National Patient Register

**eTable 4.** Model coefficients for remaining uncensored in each treatment group

**eTable 5.** Association between ADHD medication initiation and 5-year mortality among individuals with ADHD

**eTable 6.** Association between ADHD medication initiation and 2-year mortality among individuals with ADHD using a 2-week interval

**eTable 7.** Association between ADHD medication initiation and 2-year mortality among individuals with ADHD without accounting for deviations from the assigned treatment strategies after the grace period.

**eTable 8.** Association between ADHD medication initiation and 2-year all-cause mortality among individuals with ADHD, without excluding competing events by using the subdistribution function

**eTable 9.** Association of stimulants versus non-stimulants with 2-year all-cause mortality among individuals with ADHD

**eTable 10.** Case-crossover analysis of the association between ADHD medication use and mortality

**eFigure 1.** Cumulative incidence curves of all-cause mortality

### eReferences

This supplemental material has been provided by the authors to give readers additional information about their work.

## eMethods

### Data sources

Data were obtained by linking multiple Swedish registries using the unique personal identification number assigned to every individual registered in Sweden. The Total Population Register<sup>1</sup> includes all individuals in Sweden born since 1932, who were alive in 1963 and later. It also contains information on all migrations in or out of Sweden since 1969. The National Patient Register<sup>2</sup> includes data on inpatient care since 1973 and outpatient care since 2001, with diagnosis of diseases recorded by the Swedish version of the International Statistical Classification of Diseases and Related Health Problems, Tenth Revision (ICD-10) since 1997. The Prescribed Drug Register<sup>3</sup> includes detailed information on all dispensed drugs in Sweden, coded according to the Anatomical Therapeutic Chemical (ATC) classification, since July 1<sup>st</sup> 2005. The Cause of Death Register<sup>4</sup> contains information on all registered deaths since 1961, including underlying and contributing causes of death. The Longitudinal Integration Database for Health Insurance and Labor Studies<sup>5</sup> covers the entire Swedish population aged 16 or older since 1990. The Multi-Generation Register<sup>6</sup> provides family information for all residents in Sweden since 1932.

### Specifying the protocol of the target trial

#### *Eligibility Criteria*

We included all individuals aged 6-64 years residing in Sweden who were newly diagnosed with ADHD (ICD-10 code: F90) between January 1<sup>st</sup>, 2007 and December 31<sup>st</sup>, 2018. To identify new users of ADHD medication, we required a washout period without any prior dispensation of ADHD medication for at least 18 months before the index ADHD diagnosis.

#### *Treatment Strategies*

In our hypothetical target trial, we compared two treatment strategies: initiation of ADHD medication remained on the prescribed drug versus no initiation of ADHD medication. The treatment strategies needed to be implemented within a prespecified period (i.e., the grace period) after baseline.

#### *Follow-up period*

The start of follow-up (i.e., baseline or time zero) for each individual was the date of the index ADHD diagnosis. The end of follow-up was death, emigration, 24 months after follow-up, or December 31<sup>st</sup>, 2020, whichever came first. In a sensitivity analysis, we extended the maximum follow-up to 60 months.

#### *Outcomes*

The main outcomes were all-cause and cause-specific mortality. Specific causes of death were categorized into either natural or unnatural cause according to the underlying cause of death. Among the unnatural causes, we further examined three primary categories, including suicide, accidental injuries, and accidental poisoning. When examining cause-specific mortality, death due to the other causes was a competing event which was treated as censoring time points.

#### *Causal Contrasts*

The causal contrast of interest was the effect of sustained treatment with ADHD medication (as defined in the protocol), that is, the effect that would have been observed if all individuals had adhered to the treatment strategies during the entire follow-up. In a sensitivity analysis, we also estimated the effect of initiation of ADHD medication within the grace period, irrespective of treatment non-adherence after the grace period, which only required adherence to the treatment strategies during the grace period.

## The cloning, censoring, and weighting approach

Here we describe in detail our implementation of the cloning, censoring, and weighting approach<sup>7</sup> to compare the strategies “initiating ADHD medication within three months after diagnosis and remaining on treatment” versus “not initiating ADHD medication during the follow-up” in patients with ADHD.

### 1. Cloning step

The first step consists of cloning each eligible individual into two identical copies, each of whom is assigned to one treatment strategy at baseline. The expanded dataset is twice as large compared with the original dataset. Since each individual occurs in both strategies, no baseline confounding is present. This step ensures the alignment of eligibility, start of follow-up, and treatment assignment, thereby preventing immortal time bias.

### 2. Censoring step

Then copies are artificially censored if and when they deviate from their assigned treatment strategy, which ensures that the copies follow their assigned strategy. Initiation of ADHD medication on the same day as the ADHD diagnosis was labeled as "initiating treatment on day 1". At monthly (30-day) intervals, we assessed whether copies adhered to their assigned treatment strategy. Copies assigned to the initiation arm would be censored at the third month if they did not have any dispensation of ADHD medication before/on day 90, or would be censored at the month when they discontinued ADHD medication treatment or switched to another ADHD medication after the grace period. Copies assigned to the non-initiation arm would be censored at the corresponding month when they had a dispensation of ADHD medication during the follow-up. Each individual's treatment strategy was completely determined at the end of the grace period, so at most only one copy from each individual still contributes person-time to the analysis by the end of the grace period.

### 3. Weighting step

The artificial censoring is likely to be informative and therefore introduces selection bias, which needs to be adjusted for using inverse probability weighting. Informally, uncensored copies receive a weight equal to the inverse of the probability of remaining uncensored, conditional on their history of treatment and covariates. Intuitively, copies who are censored transfer their weights in the analysis to those who remain uncensored. This creates a hypothetical population in which censoring is independent of measured covariates.

To estimate the inverse probability weights, we fitted a pooled logistic regression model for each treatment arm separately,<sup>7,8</sup> allowing for potential interactions between covariates and treatment. The probability of remaining uncensored was modelled as a function of independent variables including a time indicator (natural cubic splines) and potential time-fixed and time-varying confounders. Time-fixed confounders included age (continuous), calendar year (2007-2018; each year as a category), sex (male, female), birth country (Sweden, countries other than Sweden), highest education level (primary or lower secondary, upper secondary, post-secondary or postgraduate, unknown; using parents' highest education level for those younger than 25 years), number of outpatient visits (0, 1-4, 5-9, 10+) for psychiatric and non-psychiatric reasons, number of hospitalizations (0, 1-2, 3-4, 5+) for psychiatric and non-psychiatric reasons, diagnosis of psychiatric disorders (anxiety disorder, autism spectrum disorder, bipolar disorder, conduct disorder, depressive disorder, eating disorder, intellectual disability, personality disorder, schizophrenia, alcohol use disorder, tobacco use disorder, and drug use disorder), physical diseases (cardiovascular disease, epilepsy, type 2 diabetes, and hyperlipidaemia), suicide attempt, external injuries or trauma, and dispensation of other psychotropic medications (antipsychotics, anxiolytics, hypnotics, and sedatives, antidepressants, antiepileptic drugs, anti-addiction drugs, and opioid). Time-varying confounders included the abovementioned diagnoses, dispensations, any outpatient visit for psychiatric and non-psychiatric reasons, and any hospitalization for psychiatric and non-psychiatric reasons in the previous month. The regression coefficients from these models are shown in eTable 4.

Next, we used the probabilities estimated by these models to construct the inverse probability of censoring weights. Weights were set to 1 during the first two months for copies in the initiation arm, as their probability of being uncensored is, by definition, 1. For each study participant, the weight at month  $m$  was calculated by 1 divided by the product of the predicted monthly probabilities of remaining uncensored until month  $t \leq m$  given uncensored at month  $t$ . We truncated the weights at the 99.5<sup>th</sup> percentile to avoid undue influence of extreme weights. To evaluate whether the weighting step achieved a good covariate balance between arms, we calculated the standardized mean difference (SMD) for all covariates at the end of the grace period (3 months post-baseline). A variable with an SMD  $<0.1$  is usually considered balanced. The weights showed good ability to remove imbalance at the end of the grace period, except for any outpatient visit for psychiatry in the previous month (see Table 2 in the main text).

#### 4. Primary analysis

We fitted an inverse probability weighted discrete-time hazard model using pooled logistic regression. In this model, the outcome of interest was regressed on the treatment arm and time. Because the outcome of the models is rare at all times, the odds ratio from this model approximates the hazard ratio.<sup>8,9</sup> To estimate the cumulative incidence of mortality, we used the regression-then-marginalization approach.<sup>10</sup> First, we fitted a weighted outcome regression using a pooled logistic regression model, with treatment arm, time, and treatment-time interactions as independent variables. Second, we estimated the standardized (marginal) survival at month  $m$  for the initiation group (and also for non-initiation group), by multiplying the predicted conditional probabilities of surviving to month  $t \leq m$  given survival through  $t-1$  for each study participant, and then averaging the estimate across all participants. Cumulative incidence of mortality was computed as 1 minus the standardized survival. From the cumulative incidence curve, we also obtained the absolute risks and corresponding risk differences for initiators versus non-initiators. For all the estimates, 95% confidence intervals (CIs) were computed using non-parametric bootstrap with 500 copies.

#### Case-crossover analysis

A case-crossover analysis<sup>11</sup> was employed as an approach to triangulate the evidence, which has a different study design and underlying assumptions. The aim of this analysis was to mitigate potential unmeasured confounding, in which only cases who died were included and served as their own controls. This method has been commonly used in observational studies to assess the association between transient exposures (e.g. medication use) and an acute event, typically an adverse health outcome.<sup>11</sup> As this method involves the comparison of the exposure status of individuals at the time of the event (case period) with their exposure status at other times (control periods) within the same individual, all time-invariant unmeasured confounding within each person were automatically controlled for (self-matching).

In the current study, only the 1,402 cases who died were included and served as their own controls. For each individual, their exposure status to ADHD medication on the date of their death was compared with that on 12 control dates, each corresponding to reference dates spread across the 12 months prior to their death. We additionally adjusted for time varying covariates including diagnosis of major psychiatric diseases (i.e., anxiety disorder, autism spectrum disorder, bipolar disorder, conduct disorder, depressive disorder, eating disorder, intellectual disability, personality disorder, schizophrenia, alcohol use disorder, tobacco use disorder, and other drug use disorder); major physical disease (i.e., cardiovascular disease, epilepsy, type 2 diabetes, and dyslipidemia); suicide attempt and external injuries/trauma; dispensation of other psychotropic medications (ATC codes: antipsychotics [N05A], anxiolytics, hypnotics, and sedatives [N05B, N05C], antidepressants [N06A], antiepileptic drugs [N03A], anti-addiction drugs [N07B], and opioid [N02A]), number of any outpatient visits for psychiatric and non-psychiatric reasons; number of any hospitalizations for psychiatric and non-psychiatric reasons. Odds ratios and 95% CIs were estimated using conditional logistic regression analysis, with each individual serving as a separate stratum.

By examining the outcomes separately in our case-crossover analysis, we looked at distinct events (e.g. natural death and unnatural death) separately in each analysis. This approach allowed us to examine each

outcome independently. The self-matching in the case-crossover design helps address the limitation in cohort studies that individuals censored for competing risks may differ in their exposure and outcome risk from those remaining in the cohort. In contrast, the control periods in self-matching are derived from the same cases.<sup>12</sup>

The key assumptions in case-crossover analysis include<sup>11,13</sup>:

1) Temporal Association: The exposure must be transient and associated with the outcome within a short timeframe. Our investigation focused on the effect of ADHD medication, known for its typically immediate effect; and 2) Independence of Control Period Selection: The selection of control periods should be independent of the exposure history. In our study, we adhered to this assumption by choosing 12 control dates, each corresponding to reference dates spread across the 12 months preceding the occurrence of death for each case. This deliberate selection process helped ensure that control periods were independent of prior exposure status, thereby supporting the validity of our use of this approach.

### **Estimating cause-specific hazard ratio**

When estimating cause-specific hazard ratios, we treated the competing event of other death as a censoring event. Using a competing risk analysis, such as the Fine-Gray model, would estimate subdistribution hazard ratios. However, using this model to account for competing risks would likely increase confounding rather than remove it when the aim is to estimate the direct (causal) effect of exposure on outcome. This is because when the subdistribution hazard ratio is estimated it does so by relating covariates (e.g., the exposure) to the cumulative probability of the event of interest while accounting for the cumulative probability of the competing events and the association between these competing events and covariates. And this is accomplished by not censoring individuals when they experience a competing event (e.g., die from “event B”), i.e., they are not removed from the “event A” risk set (the set of individuals at risk for event A). This becomes “unnatural” since an individual that dies from event B cannot be at risk of experiencing event A in the future. However, keeping individuals who experience the competing event in the risk set is necessary to get an unbiased estimate of the cumulative incidence. The cumulative incidence is useful for, e.g., prediction-related research questions. However, using the Fine-Gray model for analyzing the causal effects of covariates on an outcome in the presence of competing risks is likely to confound them; an exposure that increases risk for event A will decrease risk for event B, simply because event A will eliminate the possibility of event B, regardless whether the exposure also is directly causing event B or not. Hence, the Fine-Gray model will be problematic for answering the causal research question of if the exposure directly causes the outcome, such as we aim to answer in our study.

In our study, the Fine-Gray model would estimate the subdistribution hazard ratio of “natural death” (i.e., the event of interest) in the presence of death by suicide (i.e., a competing risk), and vice versa. However, the effect estimate for ADHD medication on “natural death” could be driven (entirely or partly) by the effects of ADHD medication on death by suicide. This would mean that, even in the complete absence of any direct effect of ADHD medication on “natural death”, the Fine-Gray model would estimate an increased subdistribution hazard ratio if ADHD medication users were more likely to die from “natural death” simply as a result of being less likely to die from other causes (that is, if ADHD medication was associated with lower rates of suicide). Thus, the Fine-Gray model could lead to the inference that initiation of ADHD medication is a risk factor for “natural death”, without acknowledging that it is so only by altering the rates of suicide death. i.e., based on such results the resulting recommendation with regard to "natural death" would be to not initiate ADHD medication, even though no group of individuals who had initiated ADHD medication had an increased rate of "natural death" at any given time-point. These inferences are not compatible with our causal research question. We therefore believe that it is not useful to apply the Fine-Gray model.

**eTable 1.** Anatomical Therapeutic Chemical (ATC) codes for ADHD medication from the Prescribed Drug Register

| ADHD Medications | ATC codes |
|------------------|-----------|
| Methylphenidate  | N06BA04   |
| Amphetamine      | N06BA01   |
| Dexamphetamine   | N06BA02   |
| Lisdexamfetamine | N06BA12   |
| Atomoxetine      | N06BA09   |
| Guanfacine       | C02AC02   |

**eTable 2.** The number and proportion of causes of death during a 5-year follow-up period

| Chapters                                                                                                | ICD-10 codes                                  | N   | %    |
|---------------------------------------------------------------------------------------------------------|-----------------------------------------------|-----|------|
| Natural death                                                                                           | A00-R99, U07                                  | 467 | 33.3 |
| I Certain infectious and parasitic diseases                                                             | A00-B99                                       | 16  | 3.4  |
| II Neoplasms                                                                                            | C00-D48                                       | 124 | 26.6 |
| III Diseases of the blood and blood-forming organs and certain disorders involving the immune mechanism | D50-D89                                       | <10 | -    |
| IV Endocrine, nutritional and metabolic diseases                                                        | E00-E90                                       | 27  | 5.8  |
| V Mental and behavioural disorders                                                                      | F00-F99                                       | 21  | 4.5  |
| VI Diseases of the nervous system                                                                       | G00-G99                                       | 15  | 3.2  |
| IX Diseases of the circulatory system                                                                   | I00-I99                                       | 140 | 30.0 |
| X Diseases of the respiratory system                                                                    | J00-J99                                       | 31  | 6.6  |
| XI Diseases of the digestive system                                                                     | K00-K93                                       | 32  | 6.9  |
| XIII Diseases of the musculoskeletal system and connective tissue                                       | M00-M99                                       | <10 | -    |
| XIV Diseases of the genitourinary system                                                                | N00-N99                                       | <10 | -    |
| XV Pregnancy, childbirth and the puerperium                                                             | O00-O99                                       | <10 | -    |
| XVII Congenital malformations, deformations and chromosomal abnormalities                               | Q00-Q99                                       | <10 | -    |
| XVIII Symptoms, signs and abnormal clinical and laboratory findings, not elsewhere classified           | R00-R99                                       | 47  | 10.0 |
| XXII Covid-19                                                                                           | U07.1                                         | <10 | -    |
| Unnatural death                                                                                         | S00-T98,<br>V01-Y98                           | 935 | 66.7 |
| Suicide                                                                                                 | X60-X84,<br>Y10-Y34                           | 517 | 55.3 |
| Accidental injures                                                                                      | V01-X39,<br>X50-X59                           | 76  | 8.1  |
| Accidental poisoning by and exposure to noxious substances                                              | X40-X49                                       | 311 | 33.3 |
| Other external injures                                                                                  | All other ICD<br>codes for<br>unnatural death | 31  | 3.3  |

**eTable 3.** International Classification of Diseases Tenth Revisions (ICD-10) codes from the Swedish National Patient Register

|                                    | ICD-10 codes            |
|------------------------------------|-------------------------|
| <b>Psychiatric comorbidities</b>   |                         |
| Alcohol use disorder               | F10                     |
| Tobacco use disorder               | F17                     |
| Illicit drug use disorder          | F11-F16, F18-F19        |
| Schizophrenia                      | F20-F29                 |
| Bipolar disorder                   | F30-F31                 |
| Depressive disorder                | F32-F33                 |
| Anxiety disorders                  | F40-F41                 |
| Eating disorders                   | F50                     |
| Personality disorders              | F60, F69                |
| Intellectual disability            | F70-F79                 |
| Autism spectrum disorders          | F84                     |
| Conduct disorder                   | F91                     |
| <b>Other disease and behaviors</b> |                         |
| Cardiovascular disease             | I00-I70, I73.0, I74-I75 |
| Type 2 diabetes                    | E11                     |
| Dyslipidemia                       | E78                     |
| Epilepsy                           | G40-G41                 |
| Suicide attempt                    | X60-X84, Y10-Y34        |
| External injuries                  | V00-X59, X92-Y99        |



**eTable 4.** Model coefficients for remaining uncensored in each treatment group

| Variable                                 | Initiation group |                | Non-initiation group |                |
|------------------------------------------|------------------|----------------|----------------------|----------------|
|                                          | Coefficient      | Standard error | Coefficient          | Standard error |
| Intercept                                | 0.474            | 0.026          | 1.501                | 0.028          |
| Month                                    | 0.225            | 0.022          | 1.296                | 0.026          |
| Month*                                   | 7.317            | 0.023          | 5.064                | 0.035          |
| Month**                                  | 1.752            | 0.025          | 2.260                | 0.029          |
| <b>Baseline</b>                          |                  |                |                      |                |
| Age                                      | -0.003           | 0.000          | 0.009                | 0.000          |
| Sex Female                               | -0.046           | 0.007          | -0.003               | 0.007          |
| Calendar year 2008                       | 0.084            | 0.026          | -0.101               | 0.026          |
| Calendar year 2009                       | 0.194            | 0.025          | -0.233               | 0.025          |
| Calendar year 2010                       | 0.258            | 0.024          | -0.317               | 0.024          |
| Calendar year 2011                       | 0.282            | 0.024          | -0.361               | 0.023          |
| Calendar year 2012                       | 0.230            | 0.023          | -0.329               | 0.023          |
| Calendar year 2013                       | 0.201            | 0.023          | -0.323               | 0.023          |
| Calendar year 2014                       | 0.141            | 0.023          | -0.325               | 0.023          |
| Calendar year 2015                       | 0.085            | 0.023          | -0.321               | 0.022          |
| Calendar year 2016                       | -0.014           | 0.023          | -0.293               | 0.022          |
| Calendar year 2017                       | -0.042           | 0.022          | -0.307               | 0.022          |
| Calendar year 2018                       | -0.074           | 0.022          | -0.373               | 0.022          |
| Birth country Others                     | -0.089           | 0.013          | 0.133                | 0.013          |
| Education Upper secondary                | 0.089            | 0.010          | -0.105               | 0.010          |
| Education Post-secondary or postgraduate | 0.111            | 0.011          | -0.140               | 0.011          |
| Education Unknown                        | 0.021            | 0.042          | 0.138                | 0.042          |
| Anxiety disorders                        | -0.066           | 0.014          | 0.067                | 0.014          |
| Autism spectrum disorder                 | -0.047           | 0.021          | 0.208                | 0.021          |
| Bipolar disorder                         | 0.065            | 0.024          | 0.013                | 0.023          |
| Conduct disorder                         | 0.106            | 0.029          | -0.142               | 0.029          |
| Depressive disorder                      | 0.027            | 0.012          | -0.070               | 0.012          |
| Eating disorder                          | -0.006           | 0.026          | 0.022                | 0.026          |
| Intellectual disability                  | -0.082           | 0.031          | 0.240                | 0.031          |
| Personality disorders                    | -0.049           | 0.019          | 0.040                | 0.019          |
| Schizophrenia                            | -0.073           | 0.031          | 0.222                | 0.032          |
| Alcohol use disorder                     | -0.030           | 0.016          | 0.012                | 0.016          |

| Variable                                                   | Initiation group |                | Non-initiation group |                |
|------------------------------------------------------------|------------------|----------------|----------------------|----------------|
|                                                            | Coefficient      | Standard error | Coefficient          | Standard error |
| Tobacco use disorder                                       | -0.078           | 0.058          | 0.158                | 0.059          |
| Illicit drug use disorder                                  | -0.062           | 0.016          | 0.040                | 0.016          |
| Accidental injures                                         | 0.014            | 0.008          | -0.041               | 0.008          |
| Suicide attempt history                                    | 0.014            | 0.015          | -0.038               | 0.015          |
| Cardiovascular disease                                     | -0.094           | 0.021          | 0.185                | 0.021          |
| Type 2 diabetes                                            | -0.062           | 0.044          | 0.077                | 0.044          |
| Dyslipidemia                                               | 0.002            | 0.060          | 0.038                | 0.060          |
| Epilepsy                                                   | -0.166           | 0.028          | 0.232                | 0.028          |
| Antiepileptic drugs                                        | -0.022           | 0.018          | 0.005                | 0.018          |
| Anti-addiction drugs                                       | 0.091            | 0.019          | -0.096               | 0.018          |
| Antidepressants                                            | 0.016            | 0.012          | -0.080               | 0.011          |
| Anxiolytics, hypnotics, and sedatives                      | 0.017            | 0.010          | -0.079               | 0.010          |
| Opioids                                                    | 0.075            | 0.011          | -0.126               | 0.010          |
| Antipsychotics                                             | 0.006            | 0.015          | -0.029               | 0.015          |
| Number of outpatient visit for psychiatry 1-4              | -0.054           | 0.010          | 0.060                | 0.010          |
| Number of outpatient visit for psychiatry 5-9              | -0.089           | 0.016          | 0.116                | 0.016          |
| Number of outpatient visit for psychiatry 10+              | -0.073           | 0.019          | 0.090                | 0.018          |
| Number of hospitalizations for psychiatry 1-2              | -0.057           | 0.014          | 0.084                | 0.014          |
| Number of hospitalizations for psychiatry 3-4              | -0.068           | 0.026          | 0.070                | 0.026          |
| Number of hospitalizations for psychiatry 5+               | -0.023           | 0.028          | 0.043                | 0.027          |
| Number of outpatient visits for non-psychiatric reason 1-4 | 0.000            | 0.011          | -0.027               | 0.011          |
| Number of outpatient visits for non-psychiatric reason 5-9 | -0.008           | 0.013          | -0.023               | 0.013          |
| Number of outpatient visits for non-psychiatric reason 10+ | -0.051           | 0.015          | -0.019               | 0.014          |
| Number of hospitalizations for non-psychiatric reason 1-2  | -0.023           | 0.008          | 0.016                | 0.008          |
| Number of hospitalizations for non-psychiatric reason 3-4  | -0.045           | 0.015          | 0.042                | 0.015          |

| Variable                                                 | Initiation group |                | Non-initiation group |                |
|----------------------------------------------------------|------------------|----------------|----------------------|----------------|
|                                                          | Coefficient      | Standard error | Coefficient          | Standard error |
| Number of hospitalizations for non-psychiatric reason 5+ | -0.063           | 0.019          | 0.083                | 0.018          |
| <b>Time-varying</b>                                      |                  |                |                      |                |
| Anxiety disorders                                        | -0.277           | 0.036          | 0.451                | 0.033          |
| Autism spectrum disorder                                 | -0.194           | 0.026          | 0.534                | 0.022          |
| Bipolar disorder                                         | -0.346           | 0.042          | 0.537                | 0.039          |
| Conduct disorder                                         | -0.117           | 0.061          | 0.210                | 0.049          |
| Depressive disorder                                      | -0.350           | 0.026          | 0.365                | 0.023          |
| Eating disorder                                          | -0.227           | 0.076          | 0.424                | 0.071          |
| Intellectual disability                                  | -0.170           | 0.067          | 0.548                | 0.057          |
| Personality disorders                                    | -0.125           | 0.045          | 0.437                | 0.041          |
| Schizophrenia                                            | -0.400           | 0.085          | 0.650                | 0.091          |
| Alcohol use disorder                                     | -0.266           | 0.051          | 0.322                | 0.047          |
| Tobacco use disorder                                     | -0.314           | 0.275          | 0.349                | 0.262          |
| Illicit drug use disorder                                | -0.378           | 0.038          | 0.440                | 0.034          |
| Accidental injures                                       | 0.067            | 0.036          | -0.186               | 0.034          |
| Suicide attempt history                                  | -0.049           | 0.082          | -0.277               | 0.073          |
| Cardiovascular disease                                   | -0.401           | 0.077          | 0.003                | 0.080          |
| Type 2 diabetes                                          | -0.132           | 0.169          | 0.185                | 0.180          |
| Dyslipidemia                                             | 0.362            | 0.289          | -0.048               | 0.309          |
| Epilepsy                                                 | -0.213           | 0.087          | 0.481                | 0.086          |
| Antiepileptic drugs                                      | -0.167           | 0.036          | 0.155                | 0.036          |
| Anti-addiction drugs                                     | 0.247            | 0.066          | -0.130               | 0.063          |
| Antidepressants                                          | -0.141           | 0.017          | 0.244                | 0.017          |
| Anxiolytics, hypnotics, and sedatives                    | 0.039            | 0.024          | 0.016                | 0.024          |
| Opioids                                                  | -0.021           | 0.029          | -0.035               | 0.029          |
| Antipsychotics                                           | -0.163           | 0.028          | 0.070                | 0.029          |
| Any outpatient visit for psychiatry                      | 0.480            | 0.011          | -0.847               | 0.013          |
| Any hospitalization for psychiatry                       | -0.170           | 0.041          | 0.171                | 0.031          |
| Any outpatient visit for non-psychiatric reason          | -0.106           | 0.018          | 0.191                | 0.016          |
| Any hospitalization for non-psychiatric reason           | -0.077           | 0.049          | 0.402                | 0.045          |

**eTable 5.** Association between ADHD medication initiation and five-year mortality among individuals with ADHD

|                             | Crude      |              |      |                |              |      | Weighted   |              |      |                     |                |              |      |                     |                        |                       |
|-----------------------------|------------|--------------|------|----------------|--------------|------|------------|--------------|------|---------------------|----------------|--------------|------|---------------------|------------------------|-----------------------|
|                             | Initiation |              |      | Non-initiation |              |      | Initiation |              |      |                     | Non-initiation |              |      |                     | 5-year risk difference | Hazard ratio (95% CI) |
|                             | Deaths     | Person years | IR   | Deaths         | Person years | IR   | Deaths     | Person years | IR   | 5-year risk         | Deaths         | Person years | IR   | 5-year risk         |                        |                       |
| <b>All-cause</b>            | 380        | 212,692      | 17.9 | 494            | 161,722      | 30.5 | 1,549      | 723,585      | 21.4 | 107.2 (94.8, 121.3) | 1,483          | 682,689      | 21.7 | 108.6 (98.3, 120.0) | -1.4 (-18.1, 15.3)     | 0.94 (0.88, 1.01)     |
| <b>Natural-cause</b>        | 120        | 212,692      | 5.6  | 200            | 161,722      | 12.4 | 583        | 723,585      | 8.1  | 41.0 (33.0, 51.0)   | 512            | 682,689      | 7.5  | 38.3 (32.9, 44.7)   | 2.7 (-7.7, 13.1)       | 1.04 (0.92, 1.17)     |
| <b>Unnatural-cause</b>      | 260        | 212,692      | 12.2 | 294            | 161,722      | 18.2 | 966        | 723,585      | 13.4 | 66.5 (57.4, 77.1)   | 971            | 682,689      | 14.2 | 70.5 (61.9, 80.3)   | -4.0 (-17.2, 9.2)      | 0.89 (0.81, 0.97)     |
| <b>Suicide</b>              | 150        | 212,692      | 7.1  | 150            | 161,722      | 9.3  | 544        | 723,585      | 7.5  | 37.1 (30.4, 45.2)   | 465            | 682,689      | 6.8  | 33.4 (28.0, 39.9)   | 3.7 (-5.6, 13.0)       | 1.04 (0.92, 1.18)     |
| <b>Accidental injuries</b>  | 23         | 212,692      | 1.1  | 23             | 161,722      | 1.4  | 64         | 723,585      | 0.9  | 4.4 (2.6, 7.4)      | 85             | 682,689      | 1.2  | 6.1 (3.9, 9.5)      | -1.7 (-5.2, 1.9)       | 0.71 (0.51, 0.98)     |
| <b>Accidental poisoning</b> | 78         | 212,692      | 3.7  | 111            | 161,722      | 6.9  | 323        | 723,585      | 4.5  | 22.4 (17.3, 29.1)   | 386            | 682,689      | 5.6  | 28.4 (22.7, 35.3)   | -5.9 (-14.3, 2.5)      | 0.74 (0.64, 0.86)     |

IR, Incidence rate, per 10,000 person-years; 5-year absolute risk and 5-year risk difference: per 10,000 individuals. Natural-cause mortality included death from somatic diseases and medical conditions (ICD-10 codes: A00-R99, U07) and unnatural-cause mortality included suicide, accidental injuries, accidental poisoning and other external injuries (ICD-10 codes: S00-T98, V01-Y98).

**eTable 6.** Association between ADHD medication initiation and two-year mortality among individuals with ADHD using a two-week interval

|                             | Crude      |              |      |                |              |      | Weighted   |              |      |                   |                |              |      |                   |                        |                       |
|-----------------------------|------------|--------------|------|----------------|--------------|------|------------|--------------|------|-------------------|----------------|--------------|------|-------------------|------------------------|-----------------------|
|                             | Initiation |              |      | Non-initiation |              |      | Initiation |              |      |                   | Non-initiation |              |      |                   | 2-year risk difference | Hazard ratio (95% CI) |
|                             | Deaths     | Person years | IR   | Deaths         | Person years | IR   | Deaths     | Person years | IR   | 2-year risk       | Deaths         | Person years | IR   | 2-year risk       |                        |                       |
| <b>All-cause</b>            | 231        | 133,201      | 17.3 | 292            | 91,912       | 31.8 | 613        | 317,227      | 19.3 | 38.6 (33.1, 45.0) | 729            | 308,668      | 23.6 | 47.2 (41.6, 53.6) | -8.6 (-17.0, -0.2)     | 0.77 (0.69, 0.86)     |
| <b>Natural-cause</b>        | 66         | 133,201      | 5.0  | 102            | 91,912       | 11.1 | 211        | 317,227      | 6.7  | 13.1 (9.9, 17.5)  | 228            | 308,668      | 7.4  | 14.6 (11.8, 18.1) | -1.5 (-6.4, 3.5)       | 0.86 (0.71, 1.04)     |
| <b>Unnatural-cause</b>      | 165        | 133,201      | 12.4 | 190            | 91,912       | 20.7 | 401        | 317,227      | 12.6 | 25.4 (21.2, 30.3) | 501            | 308,668      | 16.2 | 32.5 (27.9, 38.0) | -7.2 (-14.0, -0.4)     | 0.73 (0.64, 0.84)     |
| <b>Suicide</b>              | 103        | 133,201      | 7.7  | 105            | 91,912       | 11.4 | 252        | 317,227      | 7.9  | 15.9 (12.7, 20.0) | 268            | 308,668      | 8.7  | 17.4 (14.1, 21.5) | -1.5 (-6.7, 3.7)       | 0.86 (0.73, 1.03)     |
| <b>Accidental injures</b>   | 19         | 133,201      | 1.4  | 11             | 91,912       | 1.2  | 39         | 317,227      | 1.2  | 2.5 (1.5, 4.1)    | 32             | 308,668      | 1.0  | 2.1 (1.1, 3.9)    | 0.4 (-1.4, 2.2)        | 1.25 (0.79, 2.01)     |
| <b>Accidental poisoning</b> | 38         | 133,201      | 2.9  | 68             | 91,912       | 7.4  | 97         | 317,227      | 3.1  | 6.1 (4.2, 8.8)    | 181            | 308,668      | 5.9  | 11.8 (9.1, 15.2)  | -5.6 (-9.4, -1.9)      | 0.47 (0.36, 0.60)     |

IR, Incidence rate, per 10,000 person-years; 2-year absolute risk and 2-year risk difference: per 10,000 individuals. Natural-cause mortality included death from somatic diseases and medical conditions (ICD-10 codes: A00-R99, U07) and unnatural-cause mortality included suicide, accidental injuries, accidental poisoning and other external injuries (ICD-10 codes: S00-T98, V01-Y98).

**eTable 7.** Association between ADHD medication initiation and two-year mortality among individuals with ADHD without accounting for deviations from the assigned treatment strategies after the grace period

|                             | Crude      |              |      |                |              |      | Weighted   |              |      |                   |                |              |      |                   |                        |                       |
|-----------------------------|------------|--------------|------|----------------|--------------|------|------------|--------------|------|-------------------|----------------|--------------|------|-------------------|------------------------|-----------------------|
|                             | Initiation |              |      | Non-initiation |              |      | Initiation |              |      |                   | Non-initiation |              |      |                   | 2-year risk difference | Hazard ratio (95% CI) |
|                             | Deaths     | Person years | IR   | Deaths         | Person years | IR   | Deaths     | Person years | IR   | 2-year risk       | Deaths         | Person years | IR   | 2-year risk       |                        |                       |
| <b>All-cause</b>            | 316        | 183,770      | 17.2 | 383            | 132,077      | 29.0 | 570        | 300,831      | 19.0 | 38.0 (33.7, 42.7) | 698            | 299,117      | 23.3 | 46.4 (41.9, 51.4) | -8.4 (-15.0, -1.9)     | 0.82 (0.73, 0.91)     |
| <b>Natural-cause</b>        | 89         | 183,770      | 4.8  | 127            | 132,077      | 9.6  | 175        | 300,831      | 5.8  | 11.7 (9.3, 14.5)  | 212            | 299,117      | 7.1  | 14.1 (11.8, 16.9) | -2.5 (-6.1, 1.2)       | 0.83 (0.68, 1.01)     |
| <b>Unnatural-cause</b>      | 227        | 183,770      | 12.4 | 256            | 132,077      | 19.4 | 395        | 300,831      | 13.1 | 26.3 (22.9, 30.3) | 485            | 299,117      | 16.2 | 32.3 (28.5, 36.7) | -6.0 (-11.5, -0.5)     | 0.81 (0.71, 0.93)     |
| <i>Suicide</i>              | 144        | 183,770      | 7.8  | 138            | 132,077      | 10.4 | 248        | 300,831      | 8.2  | 16.5 (13.9, 19.7) | 259            | 299,117      | 8.6  | 17.2 (14.5, 20.5) | -0.7 (-4.8, 3.4)       | 0.96 (0.81, 1.14)     |
| <i>Accidental injures</i>   | 23         | 183,770      | 1.3  | 16             | 132,077      | 1.2  | 36         | 300,831      | 1.2  | 2.4 (1.5, 3.7)    | 36             | 299,117      | 1.2  | 2.3 (1.4, 3.9)    | 0.0 (-1.5, 1.6)        | 1.02 (0.64, 1.62)     |
| <i>Accidental poisoning</i> | 52         | 183,770      | 2.8  | 90             | 132,077      | 6.8  | 97         | 300,831      | 3.2  | 6.4 (4.8, 8.6)    | 166            | 299,117      | 5.5  | 11.1 (9.0, 13.7)  | -4.6 (-7.6, -1.6)      | 0.58 (0.45, 0.75)     |

IR, Incidence rate, per 10,000 person-years; 2-year absolute risk and 2-year risk difference: per 10,000 individuals. Natural-cause mortality included death from somatic diseases and medical conditions (ICD-10 codes: A00-R99, U07) and unnatural-cause mortality included suicide, accidental injuries, accidental poisoning and other external injuries (ICD-10 codes: S00-T98, V01-Y98).

**eTable 8.** Association between ADHD medication initiation and two-year all-cause mortality among individuals with ADHD, without excluding competing events by using the subdistribution function

|                        | Initiation |              |                        |                   | Non-initiation |              |                        |                   | 2-year risk difference | Hazard ratio (95% CI) |
|------------------------|------------|--------------|------------------------|-------------------|----------------|--------------|------------------------|-------------------|------------------------|-----------------------|
|                        | Deaths     | Person years | IR/10,000 person-years | 2-year risk       | Deaths         | Person years | IR/10,000 person-years | 2-year risk       |                        |                       |
| <b>Natural-cause</b>   | 203        | 310,362      | 6.6                    | 11.0 (8.2, 14.8)  | 226            | 307,604      | 7.4                    | 12.6 (10.1, 15.7) | -1.6 (-8.7, 3.8)       | 0.90 (0.63, 1.27)     |
| <b>Unnatural-cause</b> | 395        | 310,362      | 12.7                   | 20.4 (17.0, 24.5) | 505            | 307,604      | 16.4                   | 28.5 (24.3, 33.3) | -8.0 (-20.6, -3.8)     | 0.78 (0.62, 0.99)     |

IR, Incidence rate, per 10,000 person-years; 2-year absolute risk and 2-year risk difference: per 10,000 individuals. Natural-cause mortality included death from somatic diseases and medical conditions (ICD-10 codes: A00-R99, U07) and unnatural-cause mortality included suicide, accidental injuries, accidental poisoning and other external injuries (ICD-10 codes: S00-T98, V01-Y98).

**eTable 9.** Association of stimulants versus non-stimulants with two-year all-cause mortality among individuals with ADHD

|                     | Stimulants |              |                |                   | Non-stimulants |              |                |                   | HR (95% CI)       |
|---------------------|------------|--------------|----------------|-------------------|----------------|--------------|----------------|-------------------|-------------------|
|                     | Deaths     | Person years | Incidence rate | 2-year risk       | Deaths         | Person years | Incidence rate | 2-year risk       |                   |
| All-cause mortality | 172        | 116,078      | 14.8           | 29.1 (24.6, 34.5) | 153            | 98,872       | 15.5           | 30.3 (19.0, 48.3) | 0.96 (0.58, 1.58) |

Incidence rate was reported per 10,000 person-years; 2-year risk was reported per 10,000 individuals.



**eTable 10.** Case-crossover analysis of the association between ADHD medication use and mortality

|                 | No. of deaths | Crude odds ratio<br>(95% CI)* | Adjusted odds ratio<br>(95% CI)# |
|-----------------|---------------|-------------------------------|----------------------------------|
| All-cause       | 1402          | 0.65 (0.53-0.81)              | 0.70 (0.57-0.88)                 |
| Natural-cause   | 467           | 0.74 (0.49-1.11)              | 0.81 (0.53-1.24)                 |
| Unnatural-cause | 935           | 0.62 (0.48-0.80)              | 0.66 (0.51-0.85)                 |

\*In the crude model, all time-invariant confounders (e.g., sex, genetic makeup, and early life experiences) were automatically controlled by design.

#In the adjusted model, the following time-varying covariates were further adjusted for: diagnosis of major psychiatric diseases (i.e., anxiety disorder, autism spectrum disorder, bipolar disorder, conduct disorder, depressive disorder, eating disorder, intellectual disability, personality disorder, schizophrenia, alcohol use disorder, tobacco use disorder, and other drug use disorder); major physical disease (i.e., cardiovascular disease, epilepsy, type 2 diabetes, and dyslipidemia); suicide attempt and external injures/trauma; dispensation of other psychotropic medications (ATC codes: antipsychotics [N05A], anxiolytics, hypnotics, and sedatives [N05B, N05C], antidepressants [N06A], antiepileptic drugs [N03A], anti-addiction drugs [N07B], and opioid [N02A]), any outpatient visit for psychiatric and non-psychiatric reasons; any hospitalization for psychiatric and non-psychiatric reasons.

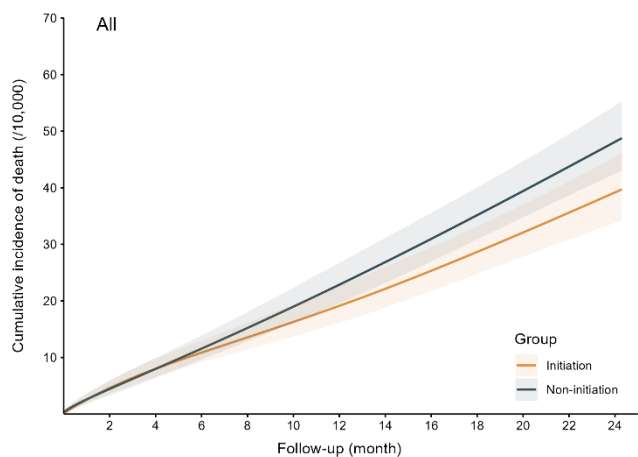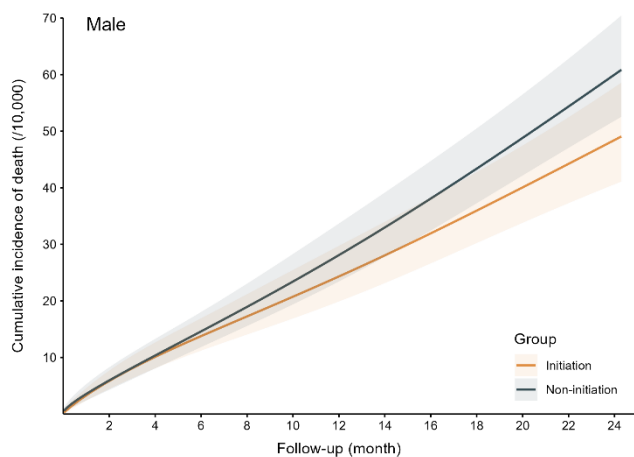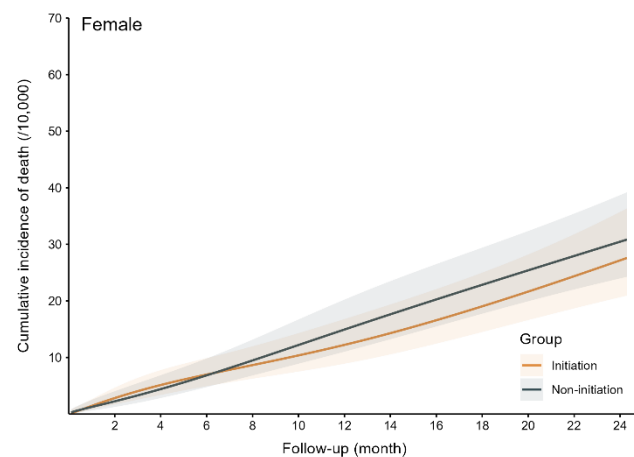

|                 | 6 months         | 12 months         | 18 months          | 24 months          |
|-----------------|------------------|-------------------|--------------------|--------------------|
| Initiation      | 10.9 (9.1, 12.9) | 19.1 (16.2, 22.6) | 28.7 (24.8, 33.1)  | 39.2 (33.8, 45.4)  |
| Non-initiation  | 11.6 (9.6, 13.9) | 22.9 (19.6, 26.7) | 35.2 (30.9, 40.0)  | 48.1 (42.5, 54.5)  |
| Risk difference | -0.7 (-3.5, 2.1) | -3.7 (-8.5, 1.1)  | -6.5 (-12.6, -0.3) | -8.9 (-17.2, -0.6) |

|                 | 6 months          | 12 months         | 18 months         | 24 months          |
|-----------------|-------------------|-------------------|-------------------|--------------------|
| Initiation      | 13.8 (11.2, 16.9) | 24.3 (19.9, 29.7) | 36.0 (30.2, 42.8) | 48.4 (40.6, 57.7)  |
| Non-initiation  | 14.6 (11.8, 18.0) | 28.1 (23.4, 33.7) | 43.4 (37.3, 50.5) | 60.0 (51.9, 69.4)  |
| Risk difference | -0.8 (-5.0, 3.3)  | -3.8 (-10.8, 3.3) | -7.4 (-16.4, 1.6) | -11.5 (-23.7, 0.7) |

|                 | 6 months        | 12 months         | 18 months         | 24 months         |
|-----------------|-----------------|-------------------|-------------------|-------------------|
| Initiation      | 7.0 (4.9, 9.9)  | 12.2 (8.9, 16.8)  | 19.1 (14.5, 25.0) | 27.2 (20.7, 35.7) |
| Non-initiation  | 6.9 (4.8, 9.8)  | 14.9 (11.0, 20.2) | 22.9 (17.8, 29.4) | 30.5 (24.0, 38.7) |
| Risk difference | 0.1 (-3.3, 3.6) | -2.7 (-8.8, 3.2)  | -3.8 (-11.5, 3.9) | -3.3 (-13.7, 7.1) |

**eFigure 1.** Cumulative incidence curves of all-cause mortality

Cumulative incidence of all-cause mortality was presented per 10,000.

## eReferences

1. Ludvigsson JF, Almqvist C, Bonamy A-KE, et al. Registers of the Swedish total population and their use in medical research. *European Journal of Epidemiology*. 2016/02/01 2016;31(2):125-136. doi:10.1007/s10654-016-0117-y
2. Ludvigsson JF, Andersson E, Ekblom A, et al. External review and validation of the Swedish national inpatient register. *BMC Public Health*. 2011/06/09 2011;11(1):450. doi:10.1186/1471-2458-11-450
3. Wettermark B, Hammar N, Fored CM, et al. The new Swedish Prescribed Drug Register--opportunities for pharmacoepidemiological research and experience from the first six months. *Pharmacoepidemiol Drug Saf*. Jul 2007;16(7):726-35. doi:10.1002/pds.1294
4. Brooke HL, Talbäck M, Hörnblad J, et al. The Swedish cause of death register. *European Journal of Epidemiology*. 2017/09/01 2017;32(9):765-773. doi:10.1007/s10654-017-0316-1
5. Ludvigsson JF, Svedberg P, Olén O, Bruze G, Neovius M. The longitudinal integrated database for health insurance and labour market studies (LISA) and its use in medical research. *Eur J Epidemiol*. Apr 2019;34(4):423-437. doi:10.1007/s10654-019-00511-8
6. Ekblom A. The Swedish Multi-generation Register. *Methods in molecular biology (Clifton, NJ)*. 2011;675:215-20. doi:10.1007/978-1-59745-423-0\_10
7. Maringe C, Benitez Majano S, Exarchakou A, et al. Reflection on modern methods: trial emulation in the presence of immortal-time bias. Assessing the benefit of major surgery for elderly lung cancer patients using observational data. *Int J Epidemiol*. Oct 1 2020;49(5):1719-1729. doi:10.1093/ije/dyaa057
8. Danaei G, Rodriguez LAG, Cantero OF, Logan RW, Hernan MA. Electronic medical records can be used to emulate target trials of sustained treatment strategies. *J Clin Epidemiol*. Apr 2018;96:12-22. doi:10.1016/j.jclinepi.2017.11.021
9. Emilsson L, Garcia-Albeniz X, Logan RW, Caniglia EC, Kalager M, Hernan MA. Examining Bias in Studies of Statin Treatment and Survival in Patients With Cancer. *JAMA Oncol*. Jan 1 2018;4(1):63-70. doi:10.1001/jamaoncol.2017.2752
10. Toh S, Hernandez-Diaz S, Logan R, Robins JM, Hernan MA. Estimating absolute risks in the presence of nonadherence: an application to a follow-up study with baseline randomization. *Epidemiology*. Jul 2010;21(4):528-39. doi:10.1097/EDE.0b013e3181df1b69
11. Hallas J, Pottegård A. Use of self - controlled designs in pharmacoepidemiology. *Journal of internal medicine*. 2014;275(6):581-589.
12. Mittleman MA, Mostofsky E. Exchangeability in the case-crossover design. *International journal of epidemiology*. 2014;43(5):1645-1655.
13. Maclure M, Mittleman, MA. Should we use a case-crossover design? *Annual review of public health*. 2000;21(1):193-221.
