# Supplementary material
Source: PubMed Central journal article supplement (PMC10936112)
Supplement: jama-e240851-s002.pdf [file jama-e240851-s002.pdf]

## Data Sharing Statement

Li. ADHD Pharmacotherapy and Mortality in Individuals With ADHD. *JAMA*. Published March 12, 2024. doi:10.1001/jama.2024.0851

### Data

**Data available:** No

### Additional Information

**Explanation for why data not available:** The data supporting the findings of this study are available from Statistics Sweden and The Swedish National Board of Health and Welfare; however, due to ethical permissions and restrictions, these data are not publicly available.
